# Supplementary material
Source: PubMed Central journal article supplement (PMC2922686)

# Right Hemisphere

V1

V2

V3

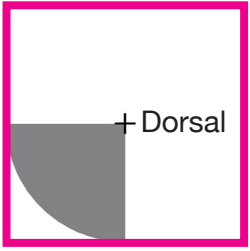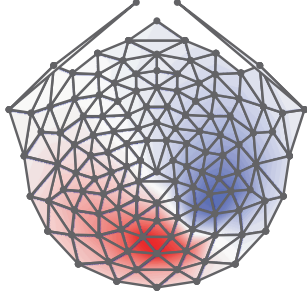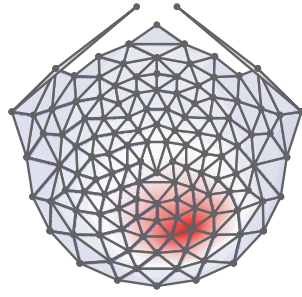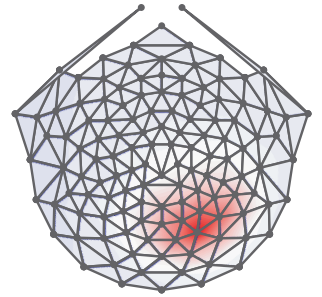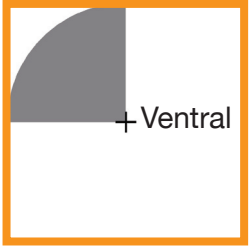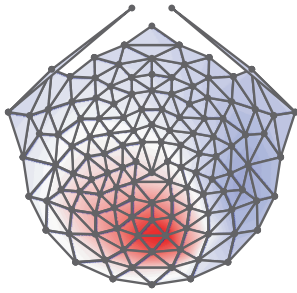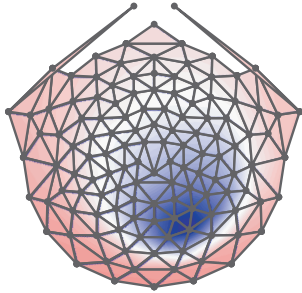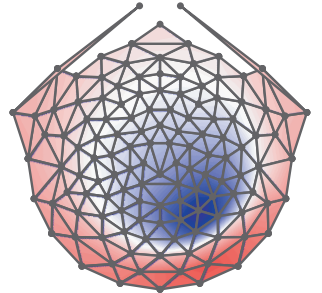

Supplement: NIHMS214300-supplement-01.pdf [file NIHMS214300-supplement-01.pdf]

Left Hemisphere

V1

V2

V3

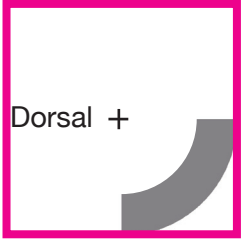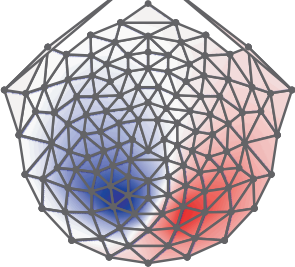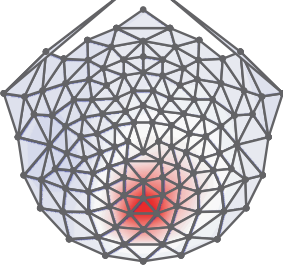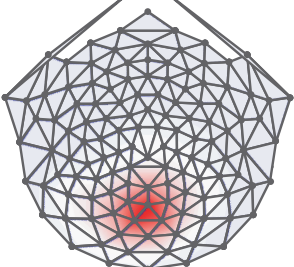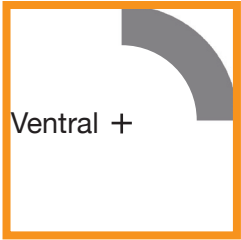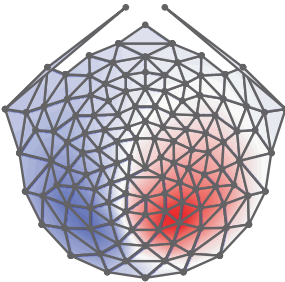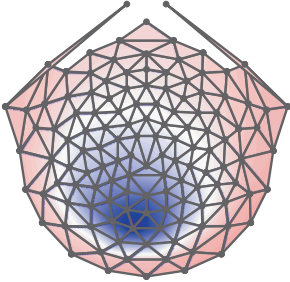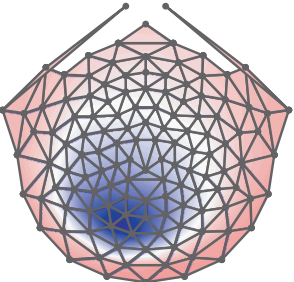

Supplement: NIHMS214300-supplement-02.pdf [file NIHMS214300-supplement-02.pdf]

Left Hemisphere

V1

V2

V3

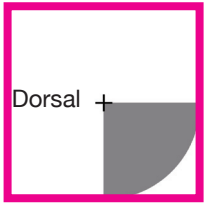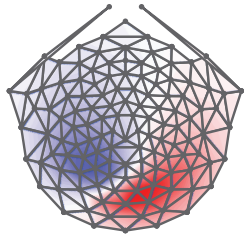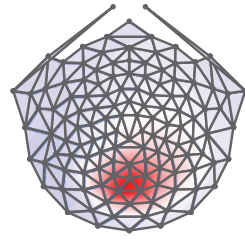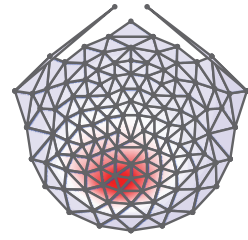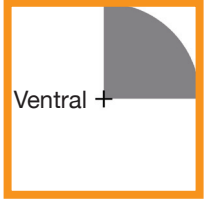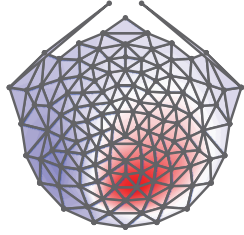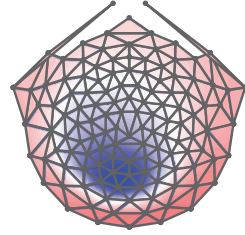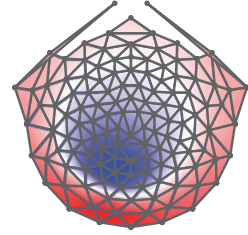

Supplement: NIHMS214300-supplement-03.pdf [file NIHMS214300-supplement-03.pdf]

Left Hemisphere

V1

V2

V3

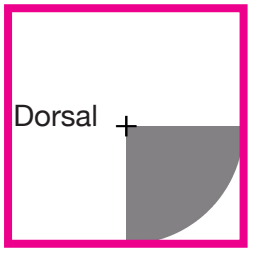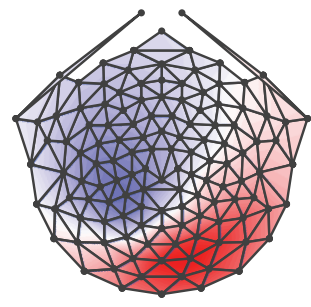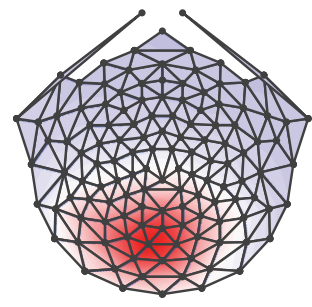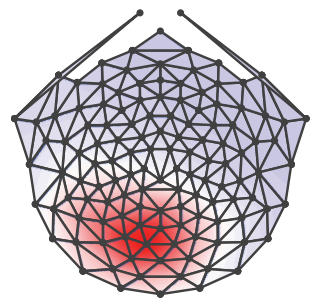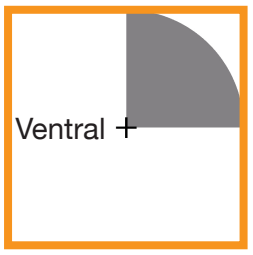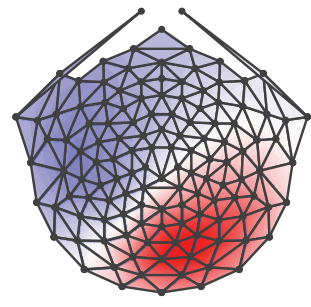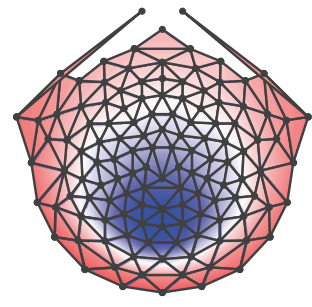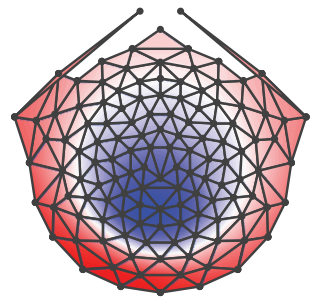

Supplement: NIHMS214300-supplement-04.pdf [file NIHMS214300-supplement-04.pdf]
